# Supplementary material
Source: publisher figshare collection journal article supplement (https://asha.figshare.com/articles/dataset/_/12808607)
Supplement: Supplementary file 1 [file 1]

```

PARTIAL CORR
/VARIABLES=nonverbIQ_raw speech_in_noise_totalGAP_avg dichotic_digits_right
_ear_accura
dichotic_digits_left_ear_accura vocab_sum sent_recall_raw sent_comp_z_avg
inferencing_rawwm_z_avg
digit_STM_percent BY age
/SIGNIFICANCE=TWOTAIL
/MISSING=LISTWISE.

```

## Partial Corr

### Notes

|                        |                                |                                                                             |
|------------------------|--------------------------------|-----------------------------------------------------------------------------|
| Output Created         |                                | 16-FEB-2020 17:00:57                                                        |
| Comments               |                                |                                                                             |
| Input                  | Data                           | C:<br>\Users\A02322725\Desktop<br>Data_V10.sav                              |
|                        | Active Dataset                 | DataSet1                                                                    |
|                        | Filter                         | LISN_CONCERN=1<br>(FILTER)                                                  |
|                        | Weight                         | <none>                                                                      |
|                        | Split File                     | <none>                                                                      |
|                        | N of Rows in Working Data File | 26                                                                          |
| Missing Value Handling | Definition of Missing          | User defined missing values are treated as missing.                         |
|                        | Cases Used                     | Statistics are based on cases with no missing data for any variable listed. |

## Notes

|           |                                                                                                                                                    |             |
|-----------|----------------------------------------------------------------------------------------------------------------------------------------------------|-------------|
| Syntax    | PARTIAL CORR                                                                                                                                       |             |
|           | /VARIABLES=nonverblQ_<br>raw speech_in_noise_total<br>GAP_avg<br>dichotic_digits_right_ear_a<br>ccura                                              |             |
|           | dichotic_digits_left_ear_ac<br>curac vocab_sum<br>sent_recall_raw<br>sent_comp_z_avg<br>inferencing_raw<br>wm_z_avg<br>digit_STM_percent BY<br>age |             |
|           | /SIGNIFICANCE=TWOTAI<br>L                                                                                                                          |             |
|           | /MISSING=LISTWISE.                                                                                                                                 |             |
| Resources | Processor Time                                                                                                                                     | 00:00:00.03 |
|           | Elapsed Time                                                                                                                                       | 00:00:00.03 |

## Correlations

| Control Variables                    |                                      |                         | nonverblQ_raw | speech_in_nois<br>e_total | GAP_avg |
|--------------------------------------|--------------------------------------|-------------------------|---------------|---------------------------|---------|
| age                                  | nonverblQ_raw                        | Correlation             | 1.000         | .143                      | .351    |
|                                      |                                      | Significance (2-tailed) | .             | .495                      | .085    |
|                                      |                                      | df                      | 0             | 23                        | 23      |
| speech_in_noise_total                | speech_in_noise_total                | Correlation             | .143          | 1.000                     | .111    |
|                                      |                                      | Significance (2-tailed) | .495          | .                         | .596    |
|                                      |                                      | df                      | 23            | 0                         | 23      |
| GAP_avg                              | GAP_avg                              | Correlation             | .351          | .111                      | 1.000   |
|                                      |                                      | Significance (2-tailed) | .085          | .596                      | .       |
|                                      |                                      | df                      | 23            | 23                        | 0       |
| dichotic_digits_right_ear_ac<br>cura | dichotic_digits_right_ear_ac<br>cura | Correlation             | .441          | -.120                     | .522    |
|                                      |                                      | Significance (2-tailed) | .027          | .568                      | .007    |
|                                      |                                      | df                      | 23            | 23                        | 23      |
| dichotic_digits_left_ear_acc<br>urac | dichotic_digits_left_ear_acc<br>urac | Correlation             | .239          | .121                      | -.043   |
|                                      |                                      | Significance (2-tailed) | .251          | .564                      | .837    |
|                                      |                                      | df                      | 23            | 23                        | 23      |

### Correlations

| Control Variables                  |               |                         | dichotic_digits_right_ear_accuracy | dichotic_digits_left_ear_accuracy |
|------------------------------------|---------------|-------------------------|------------------------------------|-----------------------------------|
| age                                | nonverblQ_raw | Correlation             | .441                               | .239                              |
|                                    |               | Significance (2-tailed) | .027                               | .251                              |
|                                    |               | df                      | 23                                 | 23                                |
| speech_in_noise_total              |               | Correlation             | -.120                              | .121                              |
|                                    |               | Significance (2-tailed) | .568                               | .564                              |
|                                    |               | df                      | 23                                 | 23                                |
| GAP_avg                            |               | Correlation             | .522                               | -.043                             |
|                                    |               | Significance (2-tailed) | .007                               | .837                              |
|                                    |               | df                      | 23                                 | 23                                |
| dichotic_digits_right_ear_accuracy |               | Correlation             | 1.000                              | .345                              |
|                                    |               | Significance (2-tailed) | .                                  | .092                              |
|                                    |               | df                      | 0                                  | 23                                |
| dichotic_digits_left_ear_accuracy  |               | Correlation             | .345                               | 1.000                             |
|                                    |               | Significance (2-tailed) | .092                               | .                                 |
|                                    |               | df                      | 23                                 | 0                                 |

### Correlations

| Control Variables                  |               |                         | vocab_sum | sent_recall_raw |
|------------------------------------|---------------|-------------------------|-----------|-----------------|
| age                                | nonverblQ_raw | Correlation             | .661      | .503            |
|                                    |               | Significance (2-tailed) | .000      | .010            |
|                                    |               | df                      | 23        | 23              |
| speech_in_noise_total              |               | Correlation             | -.091     | .374            |
|                                    |               | Significance (2-tailed) | .665      | .066            |
|                                    |               | df                      | 23        | 23              |
| GAP_avg                            |               | Correlation             | .422      | -.068           |
|                                    |               | Significance (2-tailed) | .036      | .747            |
|                                    |               | df                      | 23        | 23              |
| dichotic_digits_right_ear_accuracy |               | Correlation             | .408      | .089            |
|                                    |               | Significance (2-tailed) | .043      | .671            |
|                                    |               | df                      | 23        | 23              |
| dichotic_digits_left_ear_accuracy  |               | Correlation             | .176      | .347            |
|                                    |               | Significance (2-tailed) | .399      | .089            |
|                                    |               | df                      | 23        | 23              |

### Correlations

| Control Variables                  |               |                         | sent_comp_z_avg | inferencing_raw | wm_z_avg |
|------------------------------------|---------------|-------------------------|-----------------|-----------------|----------|
| age                                | nonverblQ_raw | Correlation             | .388            | .444            | .534     |
|                                    |               | Significance (2-tailed) | .056            | .026            | .006     |
|                                    |               | df                      | 23              | 23              | 23       |
| speech_in_noise_total              |               | Correlation             | .050            | .027            | .049     |
|                                    |               | Significance (2-tailed) | .814            | .900            | .816     |
|                                    |               | df                      | 23              | 23              | 23       |
| GAP_avg                            |               | Correlation             | .173            | -.072           | .327     |
|                                    |               | Significance (2-tailed) | .409            | .732            | .111     |
|                                    |               | df                      | 23              | 23              | 23       |
| dichotic_digits_right_ear_accuracy |               | Correlation             | .266            | .068            | .620     |
|                                    |               | Significance (2-tailed) | .199            | .747            | .001     |
|                                    |               | df                      | 23              | 23              | 23       |
| dichotic_digits_left_ear_accuracy  |               | Correlation             | .128            | .175            | .261     |
|                                    |               | Significance (2-tailed) | .543            | .402            | .207     |
|                                    |               | df                      | 23              | 23              | 23       |

### Correlations

| Control Variables                  |               |                         | digit_STM_percent |
|------------------------------------|---------------|-------------------------|-------------------|
| age                                | nonverblQ_raw | Correlation             | .593              |
|                                    |               | Significance (2-tailed) | .002              |
|                                    |               | df                      | 23                |
| speech_in_noise_total              |               | Correlation             | .197              |
|                                    |               | Significance (2-tailed) | .345              |
|                                    |               | df                      | 23                |
| GAP_avg                            |               | Correlation             | .148              |
|                                    |               | Significance (2-tailed) | .481              |
|                                    |               | df                      | 23                |
| dichotic_digits_right_ear_accuracy |               | Correlation             | .311              |
|                                    |               | Significance (2-tailed) | .130              |
|                                    |               | df                      | 23                |
| dichotic_digits_left_ear_accuracy  |               | Correlation             | .099              |
|                                    |               | Significance (2-tailed) | .638              |
|                                    |               | df                      | 23                |

## Correlations

| Control Variables |                         | nonverblQ_raw | speech_in_noise_total | GAP_avg |
|-------------------|-------------------------|---------------|-----------------------|---------|
| vocab_sum         | Correlation             | .661          | -.091                 | .422    |
|                   | Significance (2-tailed) | .000          | .665                  | .036    |
|                   | df                      | 23            | 23                    | 23      |
| sent_recall_raw   | Correlation             | .503          | .374                  | -.068   |
|                   | Significance (2-tailed) | .010          | .066                  | .747    |
|                   | df                      | 23            | 23                    | 23      |
| sent_comp_z_avg   | Correlation             | .388          | .050                  | .173    |
|                   | Significance (2-tailed) | .056          | .814                  | .409    |
|                   | df                      | 23            | 23                    | 23      |
| inferencing_raw   | Correlation             | .444          | .027                  | -.072   |
|                   | Significance (2-tailed) | .026          | .900                  | .732    |
|                   | df                      | 23            | 23                    | 23      |
| wm_z_avg          | Correlation             | .534          | .049                  | .327    |
|                   | Significance (2-tailed) | .006          | .816                  | .111    |
|                   | df                      | 23            | 23                    | 23      |
| digit_STM_percent | Correlation             | .593          | .197                  | .148    |
|                   | Significance (2-tailed) | .002          | .345                  | .481    |
|                   | df                      | 23            | 23                    | 23      |

## Correlations

| Control Variables |                         | dichotic_digits_<br>right_ear_accu<br>a | dichotic_digits_<br>left_ear_accu<br>c |
|-------------------|-------------------------|-----------------------------------------|----------------------------------------|
| vocab_sum         | Correlation             | .408                                    | .176                                   |
|                   | Significance (2-tailed) | .043                                    | .399                                   |
|                   | df                      | 23                                      | 23                                     |
| sent_recall_raw   | Correlation             | .089                                    | .347                                   |
|                   | Significance (2-tailed) | .671                                    | .089                                   |
|                   | df                      | 23                                      | 23                                     |
| sent_comp_z_avg   | Correlation             | .266                                    | .128                                   |
|                   | Significance (2-tailed) | .199                                    | .543                                   |
|                   | df                      | 23                                      | 23                                     |
| inferencing_raw   | Correlation             | .068                                    | .175                                   |
|                   | Significance (2-tailed) | .747                                    | .402                                   |
|                   | df                      | 23                                      | 23                                     |
| wm_z_avg          | Correlation             | .620                                    | .261                                   |
|                   | Significance (2-tailed) | .001                                    | .207                                   |
|                   | df                      | 23                                      | 23                                     |
| digit_STM_percent | Correlation             | .311                                    | .099                                   |
|                   | Significance (2-tailed) | .130                                    | .638                                   |
|                   | df                      | 23                                      | 23                                     |

### Correlations

| Control Variables |                         | vocab_sum | sent_recall_raw |
|-------------------|-------------------------|-----------|-----------------|
| vocab_sum         | Correlation             | 1.000     | .561            |
|                   | Significance (2-tailed) | .         | .004            |
|                   | df                      | 0         | 23              |
| sent_recall_raw   | Correlation             | .561      | 1.000           |
|                   | Significance (2-tailed) | .004      | .               |
|                   | df                      | 23        | 0               |
| sent_comp_z_avg   | Correlation             | .623      | .575            |
|                   | Significance (2-tailed) | .001      | .003            |
|                   | df                      | 23        | 23              |
| inferencing_raw   | Correlation             | .477      | .687            |
|                   | Significance (2-tailed) | .016      | .000            |
|                   | df                      | 23        | 23              |
| wm_z_avg          | Correlation             | .400      | .330            |
|                   | Significance (2-tailed) | .048      | .107            |
|                   | df                      | 23        | 23              |
| digit_STM_percent | Correlation             | .324      | .472            |
|                   | Significance (2-tailed) | .115      | .017            |
|                   | df                      | 23        | 23              |

## Correlations

| Control Variables |                         | sent_comp_z_avg | inferencing_raw | wm_z_avg |
|-------------------|-------------------------|-----------------|-----------------|----------|
| vocab_sum         | Correlation             | .623            | .477            | .400     |
|                   | Significance (2-tailed) | .001            | .016            | .048     |
|                   | df                      | 23              | 23              | 23       |
| sent_recall_raw   | Correlation             | .575            | .687            | .330     |
|                   | Significance (2-tailed) | .003            | .000            | .107     |
|                   | df                      | 23              | 23              | 23       |
| sent_comp_z_avg   | Correlation             | 1.000           | .573            | .329     |
|                   | Significance (2-tailed) | .               | .003            | .109     |
|                   | df                      | 0               | 23              | 23       |
| inferencing_raw   | Correlation             | .573            | 1.000           | .322     |
|                   | Significance (2-tailed) | .003            | .               | .117     |
|                   | df                      | 23              | 0               | 23       |
| wm_z_avg          | Correlation             | .329            | .322            | 1.000    |
|                   | Significance (2-tailed) | .109            | .117            | .        |
|                   | df                      | 23              | 23              | 0        |
| digit_STM_percent | Correlation             | .036            | .302            | .499     |
|                   | Significance (2-tailed) | .866            | .142            | .011     |
|                   | df                      | 23              | 23              | 23       |

## Correlations

| Control Variables |                         | digit_STM_percent |
|-------------------|-------------------------|-------------------|
| vocab_sum         | Correlation             | .324              |
|                   | Significance (2-tailed) | .115              |
|                   | df                      | 23                |
| sent_recall_raw   | Correlation             | .472              |
|                   | Significance (2-tailed) | .017              |
|                   | df                      | 23                |
| sent_comp_z_avg   | Correlation             | .036              |
|                   | Significance (2-tailed) | .866              |
|                   | df                      | 23                |
| inferencing_raw   | Correlation             | .302              |
|                   | Significance (2-tailed) | .142              |
|                   | df                      | 23                |
| wm_z_avg          | Correlation             | .499              |
|                   | Significance (2-tailed) | .011              |
|                   | df                      | 23                |
| digit_STM_percent | Correlation             | 1.000             |
|                   | Significance (2-tailed) | .                 |
|                   | df                      | 0                 |
