# Supplementary material
Source: publisher figshare collection journal article supplement (https://asha.figshare.com/articles/dataset/_/12808607)
Supplement: Supplementary file 2 [file 1]

## **DEVELOPMENTAL QUESTIONNAIRE**

Child's Name: \_\_\_\_\_ Gender: M / F Date of Birth: \_\_\_\_\_  
(First) (Last)

Handedness (Circle one): Right / Left / Both Current Grade in school: \_\_\_\_\_ School name: \_\_\_\_\_

Ethnicity (Circle one): *White Black Hispanic/Latino Asian American Indian Hawaiian or Alaskan Native*

Address: \_\_\_\_\_

Telephone: \_\_\_\_\_ Email: \_\_\_\_\_

### **DEVELOPMENTAL HISTORY** (Please CIRCLE Yes/No and provide information where requested)

1. Does your child have any developmental disabilities (e.g., autism, mental retardation)? Yes No
2. Does your child have any current or previous diagnosis of hearing problems? Yes No  
If yes, please describe \_\_\_\_\_  
Does your child wear a hearing aid? Yes No  
  
Does your child have ear infections? (Circle one): Never Occasionally Frequently  
Does your child have tubes placed in his/her ear right now Yes No Right / Left / Both ears  
Has your child had tubes places in his/her ears in the past Yes No Right / Left / Both ears
3. Does your child have any vision problems? Yes No  
If yes, please describe \_\_\_\_\_
4. Does your child have a history of serious health problems? Yes No  
(e.g., seizures, other neurological disorders)?  
If yes, please describe \_\_\_\_\_
5. Does your child have a history of any motor impairment/delay? Yes No  
(e.g., delayed walking, movement disorders etc.) If yes, please describe \_\_\_\_\_
6. Has your child been diagnosed with any psychological conditions (e.g., ADHD, anxiety, mood disorders, depression)?  
Yes No  
If yes, please describe \_\_\_\_\_ Is he/she on medication? Yes No  
Name of medication (s) \_\_\_\_\_
7. Has your child ever been diagnosed/received therapy for speech problems (i.e. saying his/her speech sounds)? Yes No  
If yes, please describe \_\_\_\_\_
8. Was your child a late talker? Yes No Age of: first words \_\_\_\_\_ two words utterances \_\_\_\_\_
9. Has your child ever been diagnosed with language problems (e.g., difficulty understanding what he/she hears, following directions, expressing himself/herself so others can follow)? Yes No  
If yes, describe \_\_\_\_\_
10. Has your child ever received therapy for language problems in the past (i.e. difficulty understanding what he/she hears, following directions, expressing himself/herself so others can follow)? Yes No  
If yes, please mention at what age and for how long \_\_\_\_\_
11. Do you have any concerns about your child's listening abilities or spoken language understanding **right now**? Yes No  
For example, child needs instructions to be repeated (50% or more of the time), says "huh?", "what?" five or more times a day, easily forgets or misunderstands what is said, understands fewer words than expected for his/her age etc.  
If yes, please describe \_\_\_\_\_

12. Does your child get easily distracted by background sounds or have difficulty listening in noisy situations? Yes No
13. Do you have any concerns about your child's spoken language abilities right now? Yes No  
If yes, please describe \_\_\_\_\_
14. Does your child get speech or language therapy right now in school or somewhere else?  
Speech (saying speech sounds): Yes No Language: Yes No
15. Does your child have difficulty remembering/recalling information (e.g., what was heard/seen a day/week/month earlier)?  
Yes No  
If yes, please describe \_\_\_\_\_
16. Does your child get easily distracted from completing a given task (50% or more of the time) Yes No
17. Does your child demonstrate below grade-level performance in one or more academic areas? Yes No  
If yes, please specify areas \_\_\_\_\_
18. Does your child repeatedly show a lack of motivation to learn? Yes No
19. Does your child receive any kind of help at school? Yes No  
If yes, what kind? \_\_\_\_\_
20. Where did you hear about this project? \_\_\_\_\_

**HEARING/USING ANOTHER LANGUAGE**

Does your child hear/use any other language than English? Yes No If yes, what language \_\_\_\_\_  
Which languages are spoken in the home? \_\_\_\_\_

Is your child being taught any languages other than English in school or somewhere else? Yes No  
Which language(s)? \_\_\_\_\_

How well does your child speak the other language? (circle one): *Some words* *Simple phrases* *Full conversations*  
**Mark how much your child uses the other language for conversation, NOT for any school reason**

Amount of time your child speaks another language each day. Check all that apply

|                                | 0 min | 30min | 1 hour | 2 hours | 3 hours | More than 3 hours |
|--------------------------------|-------|-------|--------|---------|---------|-------------------|
| At home                        |       |       |        |         |         |                   |
| At school                      |       |       |        |         |         |                   |
| During after school activities |       |       |        |         |         |                   |

**FAMILY HISTORY**

Does anyone else in the child's family have problems in speech, language, hearing, or learning? Yes No  
If yes, please describe problem \_\_\_\_\_ Relation to child \_\_\_\_\_

Does anyone else in the child's family have reading problems? Yes No  
If yes, please describe problem \_\_\_\_\_ Relation to child \_\_\_\_\_

**PARENT/CAREGIVER HIGHEST EDUCATION COMPLETED (Circle one)**

**Mother: Completed:** Less than high school High School College (4 year) Associate degree Master's Doctorate  
**Father: Completed:** Less than high school High School College (4 year) Associate degree Master's Doctorate

**ANNUAL FAMILY INCOME (Circle one)**

≤ \$30,000 \$31,000 to \$40,000 \$41,000 to \$69,000 \$70,000 to \$100,000 >\$100,000

NAME OF PARENT/CAREGIVER FILLING OUT THIS FORM \_\_\_\_\_ DATE \_\_\_\_\_
