# Supplementary material
Source: publisher figshare collection journal article supplement (https://asha.figshare.com/articles/dataset/_/12808607)
Supplement: Supplementary file 3 [file 1]

PARTIAL CORR

```
/VARIABLES=nonverbIQ_raw speech_in_noise_totalGAP_avg dichotic_digits_right
_ear_accura
dichotic_digits_left_ear_accura vocab_sum sent_recall_raw sent_comp_z_avg
inferencing_rawwm_z_avg
digit_STM_percent BY age
/SIGNIFICANCE=TWOTAIL
/MISSING=LISTWISE.
```

## Partial Corr

### Notes

|                        |                                |                                                                             |
|------------------------|--------------------------------|-----------------------------------------------------------------------------|
| Output Created         |                                | 16-FEB-2020 16:59:50                                                        |
| Comments               |                                |                                                                             |
| Input                  | Data                           | C:<br>\Users\A02322725\Desktop<br>Data_V10.sav                              |
|                        | Active Dataset                 | DataSet1                                                                    |
|                        | Filter                         | LISN_CONCERN=2<br>(FILTER)                                                  |
|                        | Weight                         | <none>                                                                      |
|                        | Split File                     | <none>                                                                      |
|                        | N of Rows in Working Data File | 26                                                                          |
| Missing Value Handling | Definition of Missing          | User defined missing values are treated as missing.                         |
|                        | Cases Used                     | Statistics are based on cases with no missing data for any variable listed. |

## Notes

|           |                                                                                                                                                                                                                                                                 |             |
|-----------|-----------------------------------------------------------------------------------------------------------------------------------------------------------------------------------------------------------------------------------------------------------------|-------------|
| Syntax    | PARTIAL CORR                                                                                                                                                                                                                                                    |             |
|           | /VARIABLES=nonverblQ_<br>raw speech_in_noise_total<br>GAP_avg<br>dichotic_digits_right_ear_a<br>ccura<br><br>dichotic_digits_left_ear_ac<br>curac vocab_sum<br>sent_recall_raw<br>sent_comp_z_avg<br>inferencing_raw<br>wm_z_avg<br>digit_STM_percent BY<br>age |             |
|           | /SIGNIFICANCE=TWOTAI<br>L                                                                                                                                                                                                                                       |             |
|           | /MISSING=LISTWISE.                                                                                                                                                                                                                                              |             |
| Resources | Processor Time                                                                                                                                                                                                                                                  | 00:00:00.02 |
|           | Elapsed Time                                                                                                                                                                                                                                                    | 00:00:00.03 |

## Correlations

| Control Variables                    |               |                         | nonverblQ_raw | speech_in_nois<br>e_total | GAP_avg |
|--------------------------------------|---------------|-------------------------|---------------|---------------------------|---------|
| age                                  | nonverblQ_raw | Correlation             | 1.000         | .056                      | .129    |
|                                      |               | Significance (2-tailed) | .             | .791                      | .538    |
|                                      |               | df                      | 0             | 23                        | 23      |
| speech_in_noise_total                |               | Correlation             | .056          | 1.000                     | .214    |
|                                      |               | Significance (2-tailed) | .791          | .                         | .305    |
|                                      |               | df                      | 23            | 0                         | 23      |
| GAP_avg                              |               | Correlation             | .129          | .214                      | 1.000   |
|                                      |               | Significance (2-tailed) | .538          | .305                      | .       |
|                                      |               | df                      | 23            | 23                        | 0       |
| dichotic_digits_right_ear_ac<br>cura |               | Correlation             | .318          | -.048                     | -.319   |
|                                      |               | Significance (2-tailed) | .121          | .820                      | .121    |
|                                      |               | df                      | 23            | 23                        | 23      |
| dichotic_digits_left_ear_acc<br>urac |               | Correlation             | .188          | .143                      | .164    |
|                                      |               | Significance (2-tailed) | .368          | .496                      | .435    |
|                                      |               | df                      | 23            | 23                        | 23      |

### Correlations

| Control Variables                  |               |                         | dichotic_digits_right_ear_accuracy | dichotic_digits_left_ear_accuracy |
|------------------------------------|---------------|-------------------------|------------------------------------|-----------------------------------|
| age                                | nonverblQ_raw | Correlation             | .318                               | .188                              |
|                                    |               | Significance (2-tailed) | .121                               | .368                              |
|                                    |               | df                      | 23                                 | 23                                |
| speech_in_noise_total              |               | Correlation             | -.048                              | .143                              |
|                                    |               | Significance (2-tailed) | .820                               | .496                              |
|                                    |               | df                      | 23                                 | 23                                |
| GAP_avg                            |               | Correlation             | -.319                              | .164                              |
|                                    |               | Significance (2-tailed) | .121                               | .435                              |
|                                    |               | df                      | 23                                 | 23                                |
| dichotic_digits_right_ear_accuracy |               | Correlation             | 1.000                              | -.063                             |
|                                    |               | Significance (2-tailed) | .                                  | .765                              |
|                                    |               | df                      | 0                                  | 23                                |
| dichotic_digits_left_ear_accuracy  |               | Correlation             | -.063                              | 1.000                             |
|                                    |               | Significance (2-tailed) | .765                               | .                                 |
|                                    |               | df                      | 23                                 | 0                                 |

### Correlations

| Control Variables                  |               |                         | vocab_sum | sent_recall_raw |
|------------------------------------|---------------|-------------------------|-----------|-----------------|
| age                                | nonverblQ_raw | Correlation             | -.049     | .211            |
|                                    |               | Significance (2-tailed) | .814      | .310            |
|                                    |               | df                      | 23        | 23              |
| speech_in_noise_total              |               | Correlation             | .090      | .425            |
|                                    |               | Significance (2-tailed) | .669      | .034            |
|                                    |               | df                      | 23        | 23              |
| GAP_avg                            |               | Correlation             | .080      | .042            |
|                                    |               | Significance (2-tailed) | .703      | .844            |
|                                    |               | df                      | 23        | 23              |
| dichotic_digits_right_ear_accuracy |               | Correlation             | .278      | .568            |
|                                    |               | Significance (2-tailed) | .179      | .003            |
|                                    |               | df                      | 23        | 23              |
| dichotic_digits_left_ear_accuracy  |               | Correlation             | .260      | .432            |
|                                    |               | Significance (2-tailed) | .210      | .031            |
|                                    |               | df                      | 23        | 23              |

### Correlations

| Control Variables                  |               |                         | sent_comp_z_avg | inferencing_raw | wm_z_avg |
|------------------------------------|---------------|-------------------------|-----------------|-----------------|----------|
| age                                | nonverblQ_raw | Correlation             | .352            | .131            | .295     |
|                                    |               | Significance (2-tailed) | .084            | .534            | .152     |
|                                    |               | df                      | 23              | 23              | 23       |
| speech_in_noise_total              |               | Correlation             | .284            | .335            | .220     |
|                                    |               | Significance (2-tailed) | .170            | .101            | .292     |
|                                    |               | df                      | 23              | 23              | 23       |
| GAP_avg                            |               | Correlation             | .115            | .211            | -.003    |
|                                    |               | Significance (2-tailed) | .583            | .311            | .989     |
|                                    |               | df                      | 23              | 23              | 23       |
| dichotic_digits_right_ear_accuracy |               | Correlation             | .293            | .247            | .492     |
|                                    |               | Significance (2-tailed) | .154            | .234            | .012     |
|                                    |               | df                      | 23              | 23              | 23       |
| dichotic_digits_left_ear_accuracy  |               | Correlation             | .398            | .301            | .466     |
|                                    |               | Significance (2-tailed) | .049            | .143            | .019     |
|                                    |               | df                      | 23              | 23              | 23       |

### Correlations

| Control Variables                  |               |                         | digit_STM_percent |
|------------------------------------|---------------|-------------------------|-------------------|
| age                                | nonverblQ_raw | Correlation             | .352              |
|                                    |               | Significance (2-tailed) | .085              |
|                                    |               | df                      | 23                |
| speech_in_noise_total              |               | Correlation             | .410              |
|                                    |               | Significance (2-tailed) | .042              |
|                                    |               | df                      | 23                |
| GAP_avg                            |               | Correlation             | .166              |
|                                    |               | Significance (2-tailed) | .428              |
|                                    |               | df                      | 23                |
| dichotic_digits_right_ear_accuracy |               | Correlation             | .350              |
|                                    |               | Significance (2-tailed) | .087              |
|                                    |               | df                      | 23                |
| dichotic_digits_left_ear_accuracy  |               | Correlation             | .396              |
|                                    |               | Significance (2-tailed) | .050              |
|                                    |               | df                      | 23                |

## Correlations

| Control Variables |                         | nonverblQ_raw | speech_in_noise_total | GAP_avg |
|-------------------|-------------------------|---------------|-----------------------|---------|
| vocab_sum         | Correlation             | -.049         | .090                  | .080    |
|                   | Significance (2-tailed) | .814          | .669                  | .703    |
|                   | df                      | 23            | 23                    | 23      |
| sent_recall_raw   | Correlation             | .211          | .425                  | .042    |
|                   | Significance (2-tailed) | .310          | .034                  | .844    |
|                   | df                      | 23            | 23                    | 23      |
| sent_comp_z_avg   | Correlation             | .352          | .284                  | .115    |
|                   | Significance (2-tailed) | .084          | .170                  | .583    |
|                   | df                      | 23            | 23                    | 23      |
| inferencing_raw   | Correlation             | .131          | .335                  | .211    |
|                   | Significance (2-tailed) | .534          | .101                  | .311    |
|                   | df                      | 23            | 23                    | 23      |
| wm_z_avg          | Correlation             | .295          | .220                  | -.003   |
|                   | Significance (2-tailed) | .152          | .292                  | .989    |
|                   | df                      | 23            | 23                    | 23      |
| digit_STM_percent | Correlation             | .352          | .410                  | .166    |
|                   | Significance (2-tailed) | .085          | .042                  | .428    |
|                   | df                      | 23            | 23                    | 23      |

## Correlations

| Control Variables |                         | dichotic_digits_<br>right_ear_accu<br>a | dichotic_digits_<br>left_ear_accu<br>c |
|-------------------|-------------------------|-----------------------------------------|----------------------------------------|
| vocab_sum         | Correlation             | .278                                    | .260                                   |
|                   | Significance (2-tailed) | .179                                    | .210                                   |
|                   | df                      | 23                                      | 23                                     |
| sent_recall_raw   | Correlation             | .568                                    | .432                                   |
|                   | Significance (2-tailed) | .003                                    | .031                                   |
|                   | df                      | 23                                      | 23                                     |
| sent_comp_z_avg   | Correlation             | .293                                    | .398                                   |
|                   | Significance (2-tailed) | .154                                    | .049                                   |
|                   | df                      | 23                                      | 23                                     |
| inferencing_raw   | Correlation             | .247                                    | .301                                   |
|                   | Significance (2-tailed) | .234                                    | .143                                   |
|                   | df                      | 23                                      | 23                                     |
| wm_z_avg          | Correlation             | .492                                    | .466                                   |
|                   | Significance (2-tailed) | .012                                    | .019                                   |
|                   | df                      | 23                                      | 23                                     |
| digit_STM_percent | Correlation             | .350                                    | .396                                   |
|                   | Significance (2-tailed) | .087                                    | .050                                   |
|                   | df                      | 23                                      | 23                                     |

### Correlations

| Control Variables |                         | vocab_sum | sent_recall_raw |
|-------------------|-------------------------|-----------|-----------------|
| vocab_sum         | Correlation             | 1.000     | .696            |
|                   | Significance (2-tailed) | .         | .000            |
|                   | df                      | 0         | 23              |
| sent_recall_raw   | Correlation             | .696      | 1.000           |
|                   | Significance (2-tailed) | .000      | .               |
|                   | df                      | 23        | 0               |
| sent_comp_z_avg   | Correlation             | .444      | .609            |
|                   | Significance (2-tailed) | .026      | .001            |
|                   | df                      | 23        | 23              |
| inferencing_raw   | Correlation             | .672      | .758            |
|                   | Significance (2-tailed) | .000      | .000            |
|                   | df                      | 23        | 23              |
| wm_z_avg          | Correlation             | .499      | .742            |
|                   | Significance (2-tailed) | .011      | .000            |
|                   | df                      | 23        | 23              |
| digit_STM_percent | Correlation             | .525      | .780            |
|                   | Significance (2-tailed) | .007      | .000            |
|                   | df                      | 23        | 23              |

### Correlations

| Control Variables |                         | sent_comp_z_avg | inferencing_raw | wm_z_avg |
|-------------------|-------------------------|-----------------|-----------------|----------|
| vocab_sum         | Correlation             | .444            | .672            | .499     |
|                   | Significance (2-tailed) | .026            | .000            | .011     |
|                   | df                      | 23              | 23              | 23       |
| sent_recall_raw   | Correlation             | .609            | .758            | .742     |
|                   | Significance (2-tailed) | .001            | .000            | .000     |
|                   | df                      | 23              | 23              | 23       |
| sent_comp_z_avg   | Correlation             | 1.000           | .438            | .478     |
|                   | Significance (2-tailed) | .               | .029            | .016     |
|                   | df                      | 0               | 23              | 23       |
| inferencing_raw   | Correlation             | .438            | 1.000           | .778     |
|                   | Significance (2-tailed) | .029            | .               | .000     |
|                   | df                      | 23              | 0               | 23       |
| wm_z_avg          | Correlation             | .478            | .778            | 1.000    |
|                   | Significance (2-tailed) | .016            | .000            | .        |
|                   | df                      | 23              | 23              | 0        |
| digit_STM_percent | Correlation             | .499            | .725            | .825     |
|                   | Significance (2-tailed) | .011            | .000            | .000     |
|                   | df                      | 23              | 23              | 23       |

## Correlations

| Control Variables |                         | digit_STM_percent |
|-------------------|-------------------------|-------------------|
| vocab_sum         | Correlation             | .525              |
|                   | Significance (2-tailed) | .007              |
|                   | df                      | 23                |
| sent_recall_raw   | Correlation             | .780              |
|                   | Significance (2-tailed) | .000              |
|                   | df                      | 23                |
| sent_comp_z_avg   | Correlation             | .499              |
|                   | Significance (2-tailed) | .011              |
|                   | df                      | 23                |
| inferencing_raw   | Correlation             | .725              |
|                   | Significance (2-tailed) | .000              |
|                   | df                      | 23                |
| wm_z_avg          | Correlation             | .825              |
|                   | Significance (2-tailed) | .000              |
|                   | df                      | 23                |
| digit_STM_percent | Correlation             | 1.000             |
|                   | Significance (2-tailed) | .                 |
|                   | df                      | 0                 |
